# Supplementary material for: STIM1 plays an important role in TGF-β-induced suppression of breast cancer cell proliferation
Source: PubMed Central journal article supplement (PMC4941356; doi:10.18632/oncotarget.7619), 2016-02-23
Supplement: oncotarget-07-16866-s001.pdf [file oncotarget-07-16866-s001.pdf]

## SUPPLEMENTARY FIGURES AND TABLES

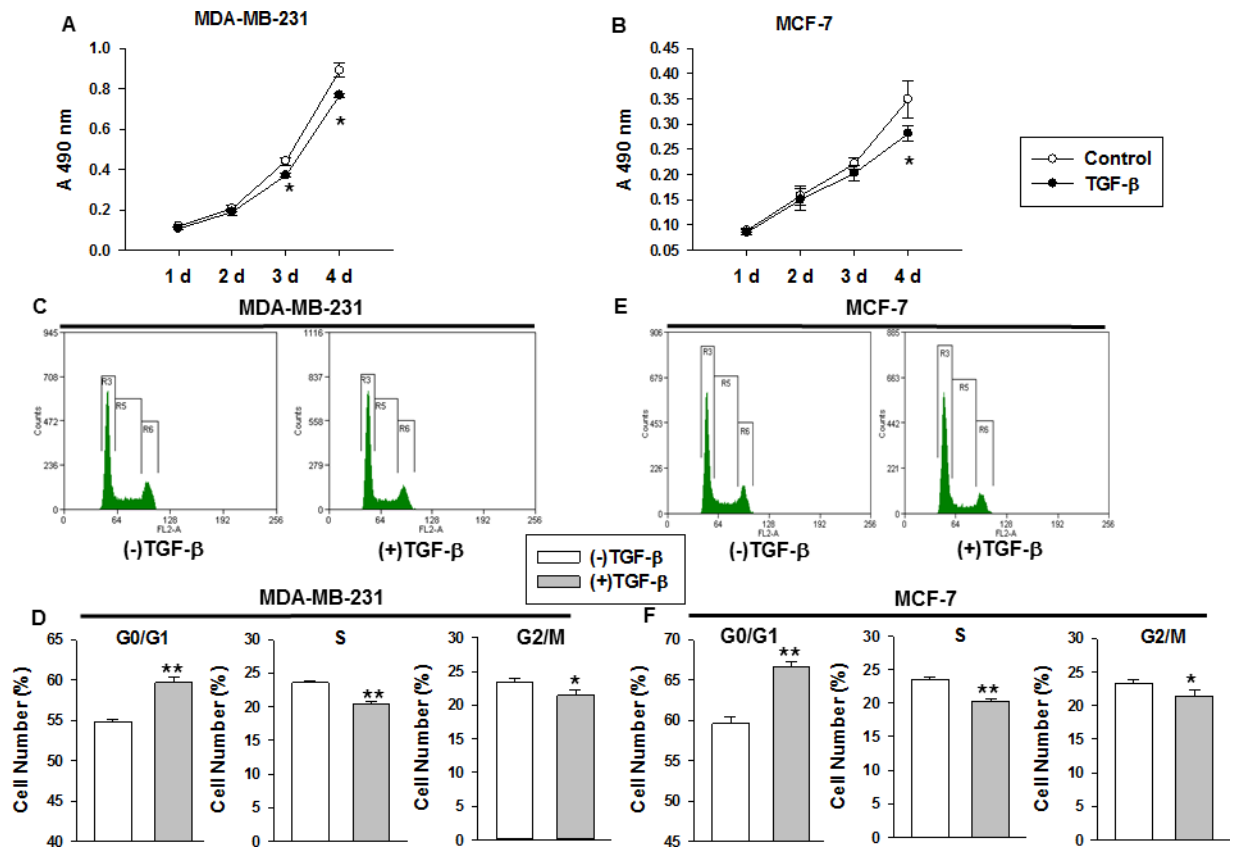

**Supplementary Figure S1: TGF- $\beta$  induced cell cycle arrest and suppression of MDA-MB-231 and MCF-7 cell proliferation.** A-B. MDA-MB-231 and MCF-7 cell proliferation were determined by MTT assay after TGF- $\beta$  (5 ng/ml) treatment for the indicated time. C. and E. Cell cycle distribution was detected by flow cytometry in MDA-MB-231 and MCF-7 cells after TGF- $\beta$  (5 ng/ml) treatment for 3 days. D. and F. The statistical analysis of MDA-MB-231 and MCF-7 cell cycle distribution at G0/G1, S and G2/M phases in TGF- $\beta$  (5 ng/ml) treatment and control groups. For this assay, bar graphs showed means  $\pm$  SE for at least three independent experiments. Significance was assessed using student's t-test \* $P$  < 0.05, \*\* $P$  < 0.01 compared with control group.

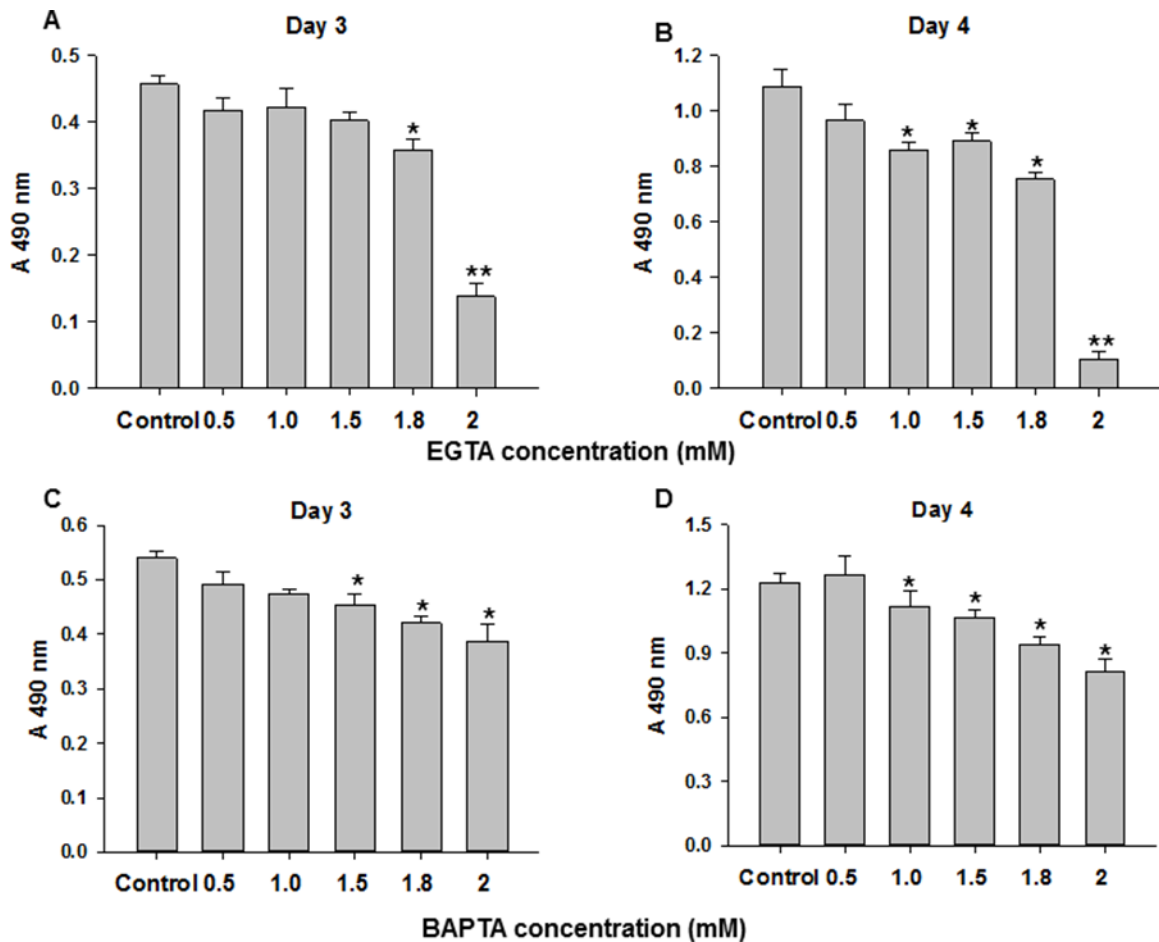

**Supplementary Figure S2: The MDA-MB-231 cell proliferation assay in various concentrations of EGTA or BAPTA treatment.** A-B. MDA-MB-231 cells were treated with various concentrations of EGTA for 3 and 4 days. C-D. MDA-MB-231 cells were treated with various concentrations of BAPTA for 3 and 4 days. The cell proliferation was determined by MTT assay. For this assay, bar graphs showed means  $\pm$  SE for at least three independent experiments. Significance was assessed using one-way ANOVA with Bonferroni's multiple comparisons post-tests \* $P < 0.05$ .

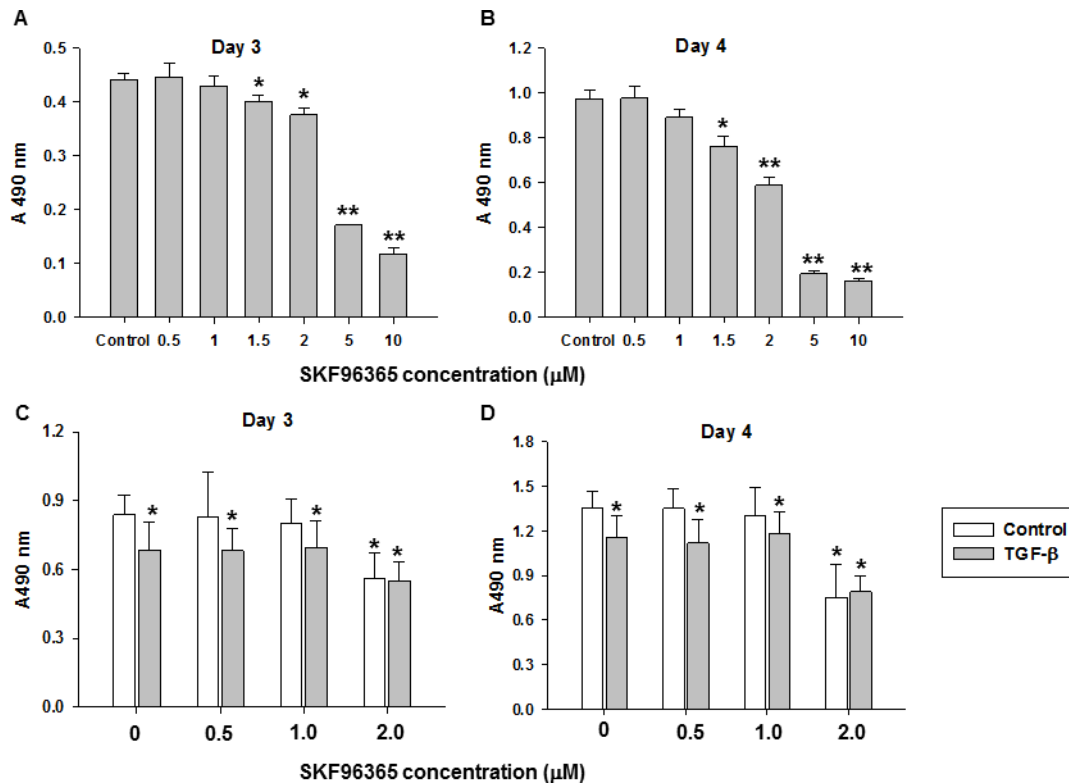

**Supplementary Figure S3: The MDA-MB-231 cell proliferation assay in TGF- $\beta$  and various concentrations of SKF96365 treatment.** A-B. MDA-MB-231 cells were treated with various concentrations of SKF96365 for 3 and 4 days, respectively. C-D. MDA-MB-231 cells were treated with various concentrations of SKF96365 with or without TGF- $\beta$ , respectively, for 3 and 4 days. \* $P < 0.05$  VS. Control and SKF 0  $\mu\text{M}$ . The cell proliferation was determined by MTT assay. For this assay, bar graphs showed means  $\pm$  SE for at least three independent experiments. Significance was assessed using one-way ANOVA with Bonferroni's multiple comparisons post-tests.

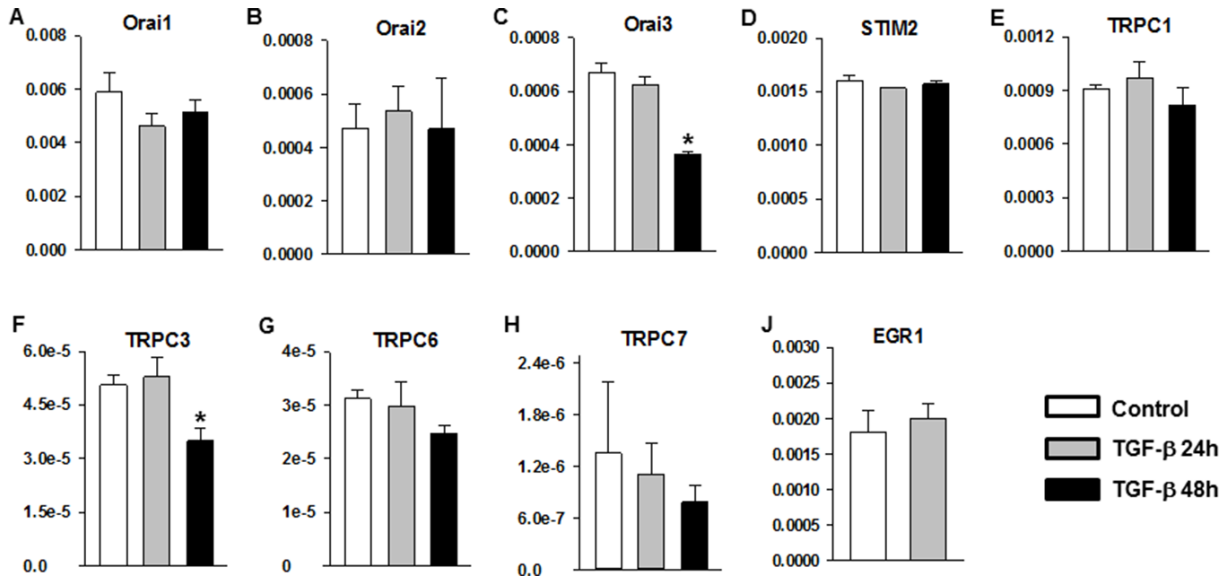

Supplementary Figure S4: The role of TGF-β on some SOC-related gene-and *EGR1* gene expression in MDA-MB-231 cells. A. *Orai1*. B. *Orai2*. C. *Orai3*. D. *STIM2*. E. *TRPC1*. F. *TRPC3*. G. *TRPC6*. H. *TRPC7*. J. *EGR1*.

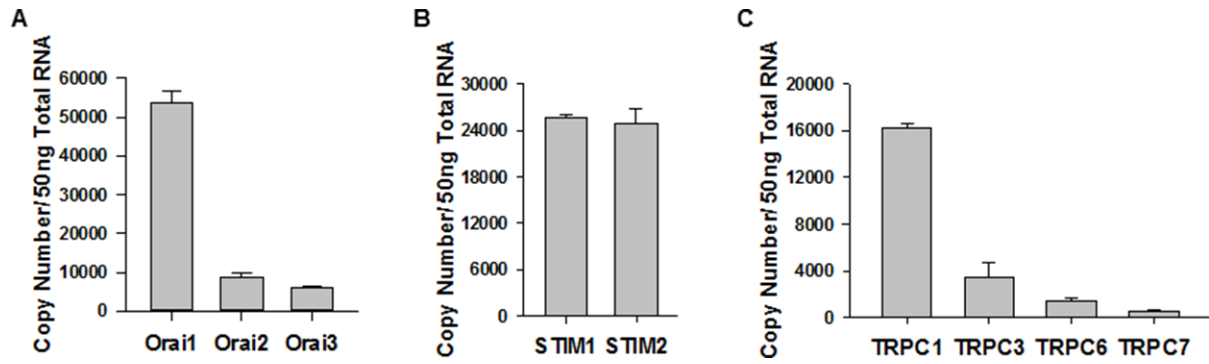

**Supplementary Figure S5: The copy numbers of SOC-related genes in MDA-MB-231 cells were analyzed by absolute quantitative RT-PCR. A.** The copy number of *Orai* channels in 50 ng total RNAs. **B.** The copy number of *STIM* sensors in 50 ng total RNAs. **C.** The copy number of *TRPC* channels in 50 ng total RNAs.

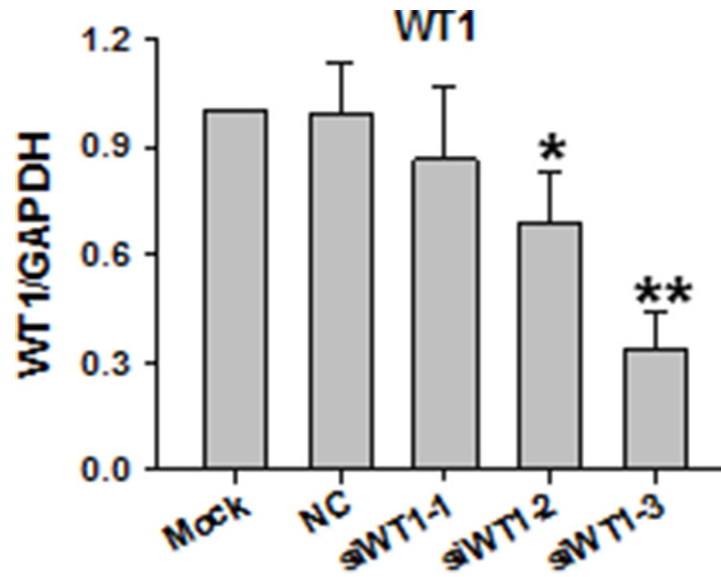

**Supplementary Figure S6: The knockdown efficiency of WT1 siRNAs.** The qRT-PCR results showed that transient transfection with WT1 siRNA decreased the WT1 expression in mRNA level.

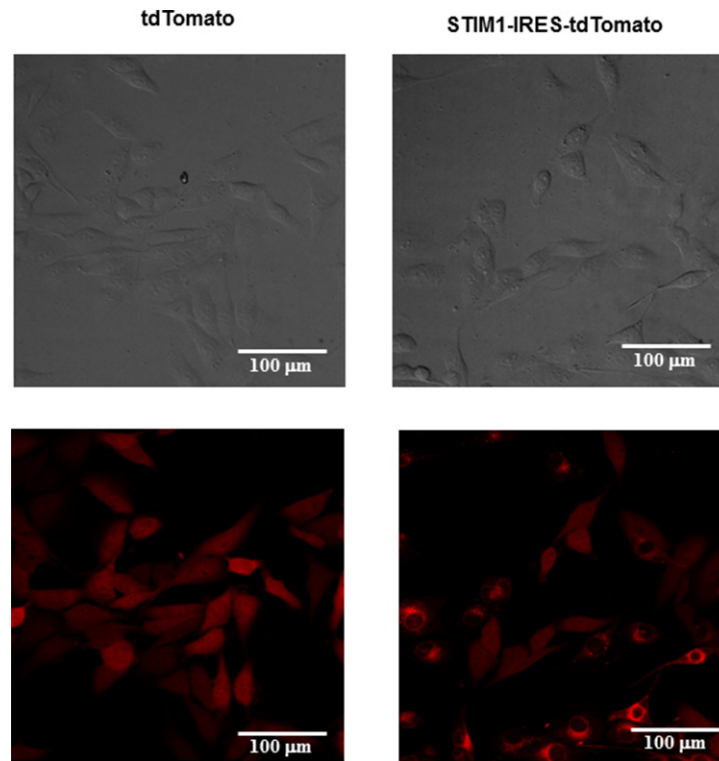

**Supplementary Figure S7: The fluorescence image of lentivirus infected MDA-MB-231 cells.** The fluorescence images were taken after lentiviral infection for 72 h under a spinning disk confocal microscope.

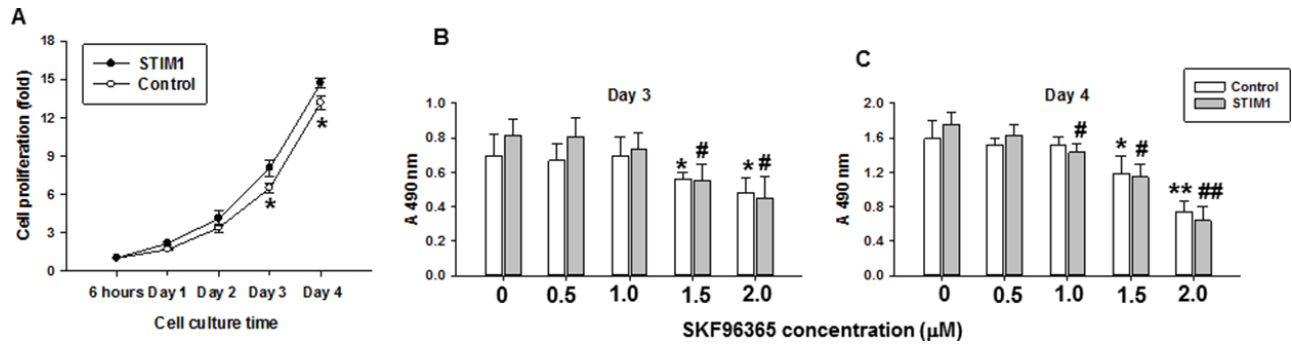

**Supplementary Figure S8: The cell proliferation assay of STIM1-overexpressing and control cells.** A. The results of proliferation assay. After culturing for 6 h, 1 day, 2 days, 3 days, 4 days, cell viability was detected using MTT assay. B-C. The results of MTT assay. STIM1-overexpressing and control cells were treated with various concentrations of SKF96365 for 3 and 4 days, respectively. \* $P < 0.05$  and \*\*  $P < 0.01$  VS. Control and SKF 0  $\mu\text{M}$ , # $P < 0.05$  and ##  $P < 0.01$  VS. STIM1-OE and SKF 0  $\mu\text{M}$ . The cell proliferation was determined by MTT assay. For this assay, bar graphs showed means  $\pm$  SE for at least three independent experiments. Significance was assessed using one-way ANOVA with Bonferroni's multiple comparisons post-tests.



**Supplementary Table S1: siRNAs sequences used in this paper**

|                  | <b>siRNA sequence (5'----3')</b>                                                       |
|------------------|----------------------------------------------------------------------------------------|
| Negative Control | Sense 5'-UUC UCC GAA CGU GUC ACG UTT-3'<br>Antisense 5'-ACG UGA CAC GUU CGG AGA ATT-3' |
| siWT1-1          | Sense 5'-CCU ACA GCA GUG ACA AUU UTT-3'<br>Antisense 5'-AAA UUG UCA CUG CUG UAG GTT-3' |
| siWT1-2          | Sense 5'-GCU UAC CCA GGC UGC AAU ATT-3'<br>Antisense 5'-UAU UGC AGC CUG GGU AAG CTT-3' |
| siWT1-3          | Sense 5'-GGA GAC AUA CAG GUG UGA ATT-3'<br>Antisense 5'-UUC ACA CCU GUA UGU CUC CTT-3' |

Supplementary Table S2: qRT-PCR primers used in this paper

| Gene name | Primer sequence (5'----3')                                  | Product length | Accession NO.  |
|-----------|-------------------------------------------------------------|----------------|----------------|
| Orai1     | F: ATGGTGGCAATGGTGGAG<br>R: CTGATCATGAGCGCAAACAG            | 115bp          | NM_032790      |
| Orai2     | F: CCGTGCTTGGCATCTACTCTT<br>R: GTGAAGACCACGAAGATGAGGC       | 184bp          | NM_001126340.2 |
| Orai3     | F: CCTTGCTGAAGTTGTCCTGGTT<br>R: ACGCAGAGGACCGTGGGAGATT      | 161bp          | NM_152288.2    |
| STIM1     | F: TGTGGAGCTGCCTCAGTATG<br>R: CTTCAGCACAGTCCCTGTCA          | 112bp          | NM_003156      |
| STIM2     | F: GGATTCGCCTGTAAGTGTGGAT<br>R: GATGCCACTGGAAGCTGGTTC       | 151bp          | NM_001169118.1 |
| TRPC1     | F: GTCGTGGTTGTGATTGTGCTTAC<br>R: GCAAATCCACTTACTGAGGCTAC    | 219bp          | NM_001251845.1 |
| TRPC3     | F: CTGCCGAGACTCAGAAGAGGTAG<br>R: CTTAATGGCAAGTTTGACACGA     | 115bp          | NM_003305.2    |
| TRPC4     | F: CACAATACAATCTGCGAATGCC<br>R: TGATCTCGGATGAATCAGGGTG      | 144bp          | NM_016179.2    |
| TRPC5     | F: TGTGGGATGGTGGATTTACTGA<br>R: ACAGGGATATGAGACGCAACGA      | 225bp          | NM_012471.2    |
| TRPC6     | F: TGGGCACAATAAACAACCAAGTA<br>R: CTTCAAGGAGTTCATAGCGGAGAC   | 215bp          | NM_004621.5    |
| TRPC7     | F: AACCTGCTAGATTTTCGGGATGCT<br>R: AAGCGAGACATTGTGCAGCGTGT   | 138bp          | NM_020389.2    |
| p21       | F: ACCTGTCACTGTCTTGTACCCTTG<br>R: AGAAATCTGTGTCATGCTGGTCTGC | 117bp          | NM_000389.4    |
| CyclinE1  | F: TTCAGGGTATCAGTGGTGCACAT<br>R: TTCTTTGCTCGGGCTTTGTCCAG    | 183bp          | NM_001238.2    |
| WT1       | F: GAAATGGACAGAAGGGCAGAGC<br>R: CAGATGCCGACCGTACAAGAGT      | 173bp          | NM_001198551.1 |
| EGR1      | F: TGCCCAGTGGAGTCCTGTGAT<br>R: CGCTCCTGGCAAACCTTCTTC        | 208bp          | NM_001238.2    |
| GAPDH     | F: TGAAGGTCGGAGTCAACGGAT<br>R: CCTGGAAGATGGTGTATGGGAT       | 225bp          | NM_002046.4    |
